# Supplementary material for: A cross-sectional study for the mental health status and sleep quality among college students in Macao during the COVID-19 pandemic
Source: PeerJ journal article supplement (doi:10.7717/peerj.12520), 2021-12-07
Supplement: GHQ+PSQI.pdf [file GHQ%2BPSQI.pdf]

问卷编号：□□-□□□□□□□□□□

问卷录入 1：\_\_\_\_\_

问卷审核：\_\_\_\_\_

问卷录入 2：\_\_\_\_\_

## 新冠肺炎疫情影响下大学生心理健康调查问卷

### 第一部分 基本资料

1.你的出生年月：\_\_\_\_\_年\_\_\_\_\_月

2.你的性别：女 男

### 第二部分 相关行为

1.你在疫情前是否有吸烟的习惯：是 否（跳转至 5）

2.你在疫情前每日平均吸烟支数：1~5 支 6~10 支 11~20 支 20 支以上

3.你在疫情期间平均每日吸烟支数是否有增加：是 否（跳转至 7）

4.增加吸烟支数的原因是：\_\_\_\_\_（跳转至 7）

5.你在疫情期间是否有尝试吸烟的行为：是 否（跳转至 7）

6.你尝试吸烟的原因是：\_\_\_\_\_

7.你在疫情前是否有饮酒的习惯：是 否（跳转至 10）

8.你在疫情期间饮酒次数和饮酒量是否有增加：是 否（跳转至 12）

9.增加饮酒次数和饮酒量的原因是：\_\_\_\_\_

10.你在疫情期间是否有尝试饮酒的行为：是 否（跳转至 12）

11.你尝试饮酒的原因是：\_\_\_\_\_

12.在疫情期间你是否遭受到网络骚扰或网络暴力：是 否

13.在疫情期间你是否遭受到家庭暴力（包括家庭冷暴力）：是 否

14.在疫情期间你是否自行通过药物缓解包括失眠多梦、神经性头痛、食欲不振、神经性腹泻等症状

或者通过使用药物追求神经兴奋：是 否

15.在疫情期间你是否寻求过或尝试寻求心理疏导：是 否

### 第三部分 12项一般健康问卷（GHQ-12）

请你回忆并选择在疫情爆发（以武汉宣布“封城”日即1月23日为界点）后的1个月内，最符合你身体情况表现的选项：

- |                   |                           |                             |                            |                             |
|-------------------|---------------------------|-----------------------------|----------------------------|-----------------------------|
| 1.在做事情的时候，能集中精神吗？ | <input type="radio"/> 能集中 | <input type="radio"/> 和平时一样 | <input type="radio"/> 不能集中 | <input type="radio"/> 完全不能  |
| 2.有由于过分担心而失眠的情况吗？ | <input type="radio"/> 没有过 | <input type="radio"/> 和平时一样 | <input type="radio"/> 有过   | <input type="radio"/> 总这样   |
| 3.觉得自己是有用的人吗？     | <input type="radio"/> 有用  | <input type="radio"/> 和平时一样 | <input type="radio"/> 没有用  | <input type="radio"/> 完全没有用 |
| 4.觉得自己有决断力吗？      | <input type="radio"/> 有   | <input type="radio"/> 和平时一样 | <input type="radio"/> 没有   | <input type="radio"/> 完全没有  |
| 5.总是处于紧张状态吗？      | <input type="radio"/> 不紧张 | <input type="radio"/> 和平时一样 | <input type="radio"/> 紧张   | <input type="radio"/> 非常紧张  |
| 6.觉得自己不能解决问题吗？    | <input type="radio"/> 能   | <input type="radio"/> 和平时一样 | <input type="radio"/> 不能   | <input type="radio"/> 完全不能  |
| 7.能享受日常活动吗？       | <input type="radio"/> 能   | <input type="radio"/> 和平时一样 | <input type="radio"/> 不能   | <input type="radio"/> 完全不能  |
| 8.能够面对你所面临的问题吗？   | <input type="radio"/> 能   | <input type="radio"/> 和平时一样 | <input type="radio"/> 不能   | <input type="radio"/> 完全不能  |
| 9.感到痛苦、忧虑吗？       | <input type="radio"/> 不觉得 | <input type="radio"/> 和平时一样 | <input type="radio"/> 觉得   | <input type="radio"/> 总是觉得  |
| 10.失去自信了吗？        | <input type="radio"/> 没有  | <input type="radio"/> 和平时一样 | <input type="radio"/> 失去   | <input type="radio"/> 完全失去  |
| 11.觉得自己是没有价值的人吗？  | <input type="radio"/> 没有  | <input type="radio"/> 和平时一样 | <input type="radio"/> 觉得   | <input type="radio"/> 总是觉得  |
| 12.觉得所有的事情都顺利吗？   | <input type="radio"/> 顺利  | <input type="radio"/> 和平时一样 | <input type="radio"/> 不顺利  | <input type="radio"/> 完全不顺利 |

### 第四部分 匹兹堡睡眠质量指数量表（PSQI）

请你回忆并选择在疫情爆发（以武汉宣布“封城”日即1月23日为界点）后的1个月内你的睡眠质量情况：

（提示：这些问题是关于你的实际睡眠状况的调查，这仅仅与你的睡眠习惯有关。请选择或填写最符合你白天和晚上睡眠实际情况的选项，并尽可能地做精确回答。划有横杠的部分是需要自己填写。）

1.在一个月中,你晚上上床睡觉通常是\_\_\_\_\_:\_\_\_\_\_ (填写具体时刻)

2.在一个月中,你每晚通常要多长时间才能入睡(从上床到入睡):\_\_\_\_\_分钟

3.在一个月中,你每天早上通常\_\_\_\_\_:\_\_\_\_\_ (填写具体时刻)点钟起床

4.在一个月中,你每晚实际睡眠的时间为\_\_\_\_\_小时(注意不等同于卧床时间)

5.在一个月中,你是否因下列情况影响睡眠而烦恼,选择一最符合你的选项作为答案,并划“√”:

a.入睡困难(不能在30分钟内入睡) ① 无 ② <1次/周 ③ 1~2次/周 ④ ≥3次/周

b.夜间易醒或早醒 ① 无 ② <1次/周 ③ 1~2次/周 ④ ≥3次/周

c.夜间去厕所 ① 无 ② <1次/周 ③ 1~2次/周 ④ ≥3次/周

d.呼吸不畅 ① 无 ② <1次/周 ③ 1~2次/周 ④ ≥3次/周

e.咳嗽或鼾声高 ① 无 ② <1次/周 ③ 1~2次/周 ④ ≥3次/周

f.感觉冷 ① 无 ② <1次/周 ③ 1~2次/周 ④ ≥3次/周

g.感觉热 ① 无 ② <1次/周 ③ 1~2次/周 ④ ≥3次/周

h.做噩梦 ① 无 ② <1次/周 ③ 1~2次/周 ④ ≥3次/周

i.疼痛不适 ① 无 ② <1次/周 ③ 1~2次/周 ④ ≥3次/周

j.其他影响睡眠的事件:\_\_\_\_\_ (如有,请填写,并勾选下方频率)

① 无 ② <1次/周 ③ 1~2次/周 ④ ≥3次/周

6.在一个月中,你认为自己的睡眠质量: ①很好 ②较好 ③较差 ④很差

7.在一个月中,你用药物催眠的情况: ① 无 ② <1次/周 ③ 1~2次/周 ④ ≥3次/周

8.在一个月中,你感到困倦吗? ① 无 ② <1次/周 ③ 1~2次/周 ④ ≥3次/周

9.在一个月中,你做事情的精力不足吗? ①没有 ②偶尔有 ③有时有 ④经常

问卷填答结束,再次感谢您的支持与参与,祝您和家人身体健康、学习和工作顺利!
